# Supplementary material for: Multi-scale structural description of siloxane–PPO hybrid ionic conductors doped by sodium salts
Source: Royal Society of Chemistry journal article supplement (doi:10.1039/b612587e), 2006-11-24
Supplement: b612587e.pdf [file b612587e.pdf]

### ELECTRONIC SUPPLEMENTARY INFORMATION

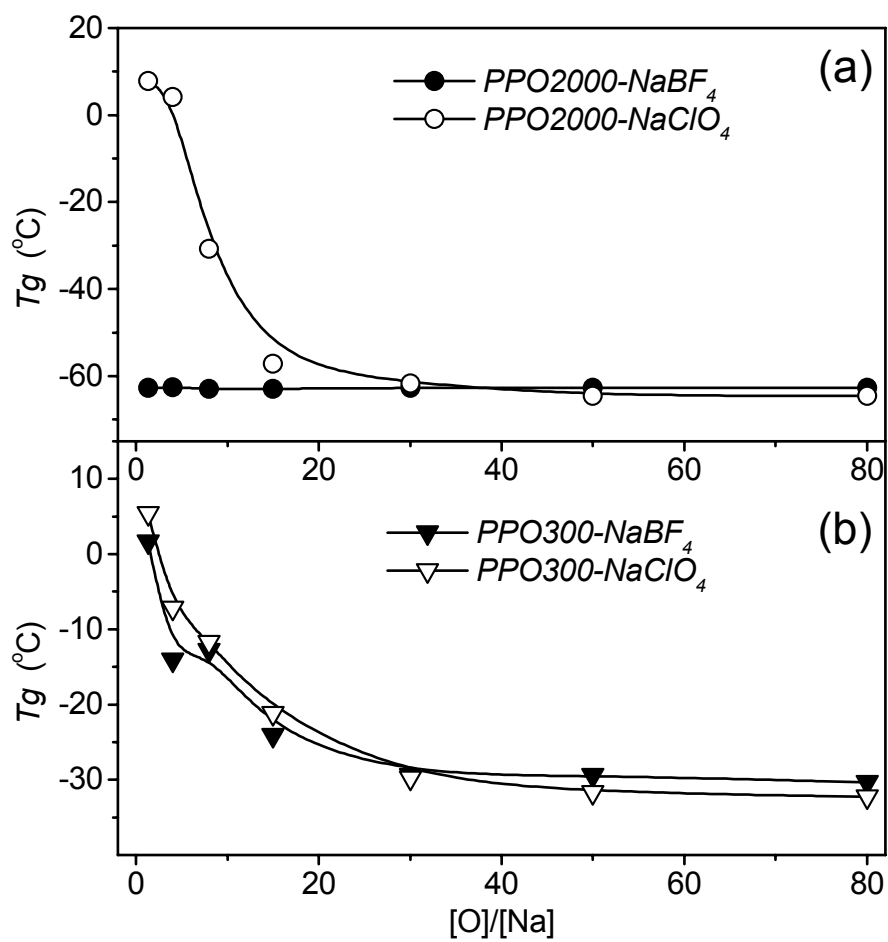

**Figure ESI1.** Values of  $T_g$  as a function of [O]/[Na] ratios for (a) PPO2000 and (b) PPO300 hybrids doped with  $\text{NaClO}_4$  and  $\text{NaBF}_4$ .

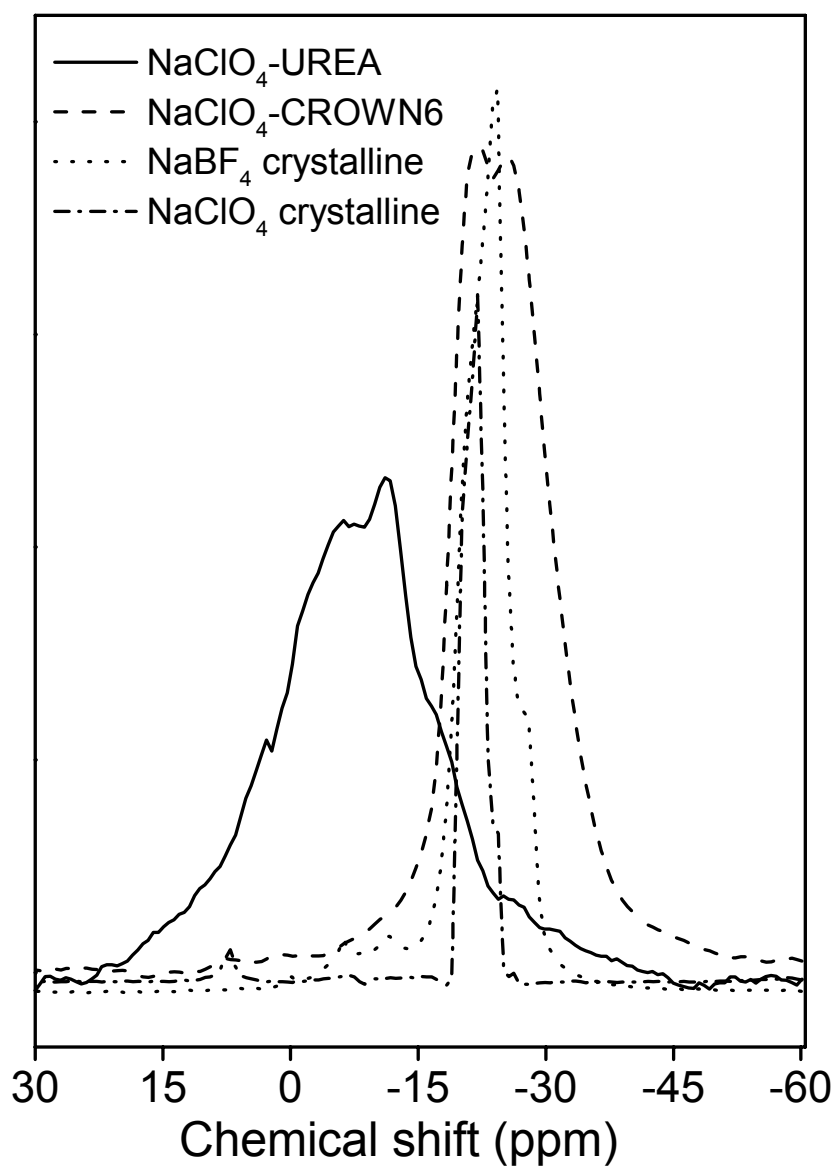

**Figure ESI2.**  $^{23}\text{Na}$  NMR/MAS spectra of  $\text{NaBF}_4$  and  $\text{NaClO}_4$  crystalline salts and 18-crown-6 ( $\text{NaClO}_4$ -CROWN6) and dipropylurea ( $\text{NaClO}_4$ -UREA) reference samples doped with  $\text{NaClO}_4$
